# Supplementary material for: Telomerase reverse transcriptase coordinates with the epithelial-to-mesenchymal transition through a feedback loop to define properties of breast cancer stem cells
Source: PubMed Central journal article supplement (PMC6078341; doi:10.1242/bio.034181), 2018-06-15
Supplement: biolopen-7-034181-s1.pdf [file biolopen-7-034181-s1.pdf]

### Supplementary Table S1: Sequence of Primers used

| Gene Name                    | Primer Sequence        |
|------------------------------|------------------------|
| Human $\beta$ -actin Forward | AGAGCTACGAGCTGCCTGAC   |
| Human $\beta$ -actin Reverse | AGCACTGTGTTGGCGTACAG   |
| Human hTERT Forward          | CGGAAGAGTGTCTGGAGCAA   |
| Human hTERT Reverse          | GGATGAAGCGGAGTCTGGA    |
| Human CDK4 Forward           | TCGAAAGCCTCTCTTCTGTG   |
| Human CDK4 Reverse           | TACATCTCGAGGCCAGTCAT   |
| Human CDK6 Forward           | GCTGGTAACTCCTTCCCCAG   |
| Human CDK6 Reverse           | GTCCAGAATCATTGCACCTGAG |
| Human TP53 Forward           | GTTCCGAGAGCTGAATGAGG   |
| Human TP53 Reverse           | TTATGGCGGGAGGTAGACTG   |
| Human E2F3 Forward           | GAGACTGAAACACACAGTCC   |
| Human E2F3 Reverse           | CCTGAGTTGGTTGAAGCC     |
| Human SMAD7 Forward          | AGAAGGTGCGGAGCAAAAT    |
| Human SMAD7 Reverse          | GTGTGGCGGACTTGATGA     |
| Human HER2 Forward           | ATCTGCCTGACATCCACG     |
| Human HER2 Reverse           | GCAATCTGCATACACCAGTTC  |

|                       |                           |
|-----------------------|---------------------------|
| Human KRAS Forward    | TGTTCAAAAGGTTTTGTCTCC     |
| Human KRAS Reverse    | CCTTATAATAGTTTCCATTGCCTTG |
| Human ALDH1A1 Forward | CGCAAGACAGGCTTTTCAG       |
| Human ALDH1A1 Reverse | TGTATAATAGTCGCCCCCTCTC    |
| Human ABCG2 Forward   | TTCCAAGCGTTCATTCAAAAA     |
| Human ABCG2 Reverse   | TACGACTGTGACAATGATCTGAGC  |
| Human CD90 Forward    | TCAGGAAATGGCTTTTCCCA      |
| Human CD90 Reverse    | TCCTCAATGAGATGCCATAAGCT   |
| Human Nestin Forward  | AGCGTTGGAACAGAGGTTGGA     |
| Human Nestin Reverse  | TGTTTCCTCCCACCCTGTGTC     |
| Human EpCAM Forward   | CGCAGCTCAGGAAGAATGTG      |
| Human EpCAM Reverse   | TGAAGTACTGTCATTGACG       |
| Human Oct4 Forward    | TGTACTCCTCGGTCCCTTTC      |
| Human Oct4 Reverse    | TCCAGGTTTTCTTCCCTAGC      |
| Human Sox2 Forward    | GCTAGTCTCCAAGCGACGAA      |
| Human Sox2 Reverse    | GCAAGAAGCCTCTCCTTGAA      |
| Human Nanog Forward   | CAGTCTGGACTGGCTGAA        |
| Human Nanog Reverse   | CTCGCTGATTAGGCTCCAAC      |
| Human Bcl-2 Forward   | GGATAACGGAGGCTGGGATG      |

|                          |                         |
|--------------------------|-------------------------|
| Human Bcl-2 Reverse      | TGACTTCACTTGTGGCCCAG    |
| Human Bax Forward        | CAAAGTGGTGCTCAAGGCC     |
| Human Bax Reverse        | GAGACAGGGACATCAGTCGC    |
| Human PARP Forward       | AGCGTGTTTCTAGGTCGTGG    |
| Human PARP Reverse       | CATCAAACATGGGCGACTGC    |
| Human N-Cadherin Forward | GGTGGAGGAGAAGAAGACCAG   |
| Human N-Cadherin Reverse | GGCATCAGGCTCCACAGT      |
| Human SNAIL Forward      | ACCACTATGCCGCGCTCTT     |
| Human SNAIL Reverse      | GGTCGTAGGGCTGCTGGAA     |
| Human Slug Forward       | TGTTGCAGTGAGGGCAAGAA    |
| Human Slug Reverse       | GACCCTGGTTGCTTCAAGGA    |
| Human ZEB1 Forward       | GATGATGAATGCGAGTCAGATGC |
| Human ZEB1 Reverse       | CTGGTCCTCTTCAGGTGCC     |
| Human Twist1 Forward     | CGGGAGTCCGCAGTCTTA      |
| Human Twist1 Reverse     | GCTTGAGGGTCTGAATCTTG    |
| Human Vimentin Forward   | TGTCAAATCGATGTGGATGTTTC |
| Human Vimentin Reverse   | TTGTACCATTCTTCTGCCTCCTG |

|                              |                        |
|------------------------------|------------------------|
| Human Desmoplakin<br>Forward | CAGTGGTGTTCAGCGATGATGT |
| Human Desmoplakin<br>Reverse | TGACGCTGGATATGGTGGAA   |
